# Supplementary material
Source: HighWire-hosted journal article supplement (http://www.jneurosci.org/highwire/filestream/599800/field_highwire_adjunct_files/0/Figure_S1.pdf)

### A GPi Burst

1 Normal    2 Transgenic

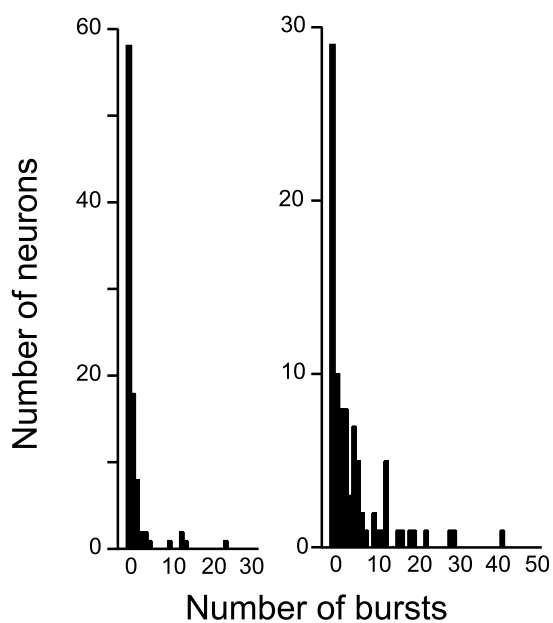

### B GPi Pause

1 Normal    2 Transgenic

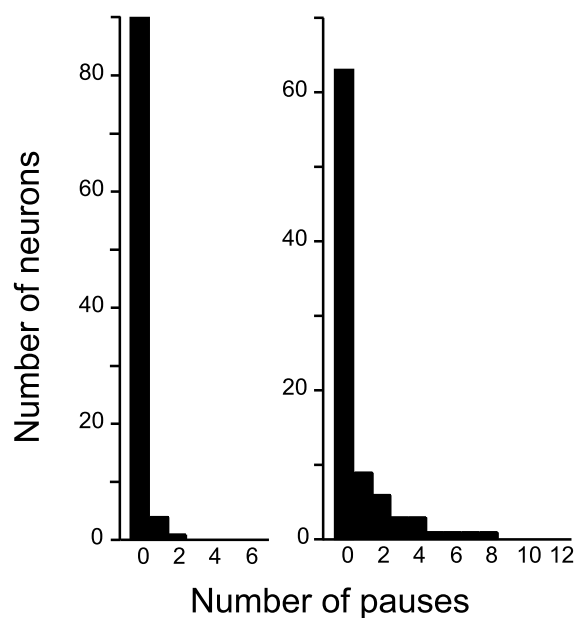

### C GPe Burst

1 Normal    2 Transgenic

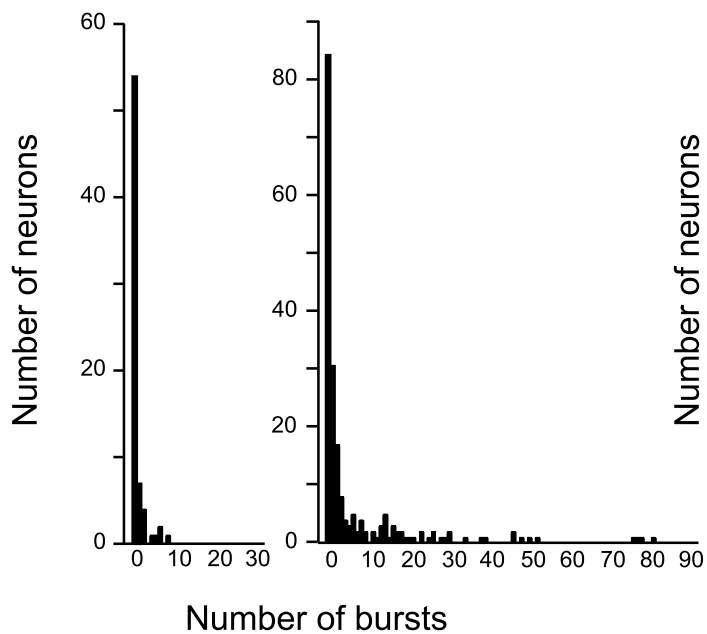

### D GPe Pause

1 Normal    2 Transgenic

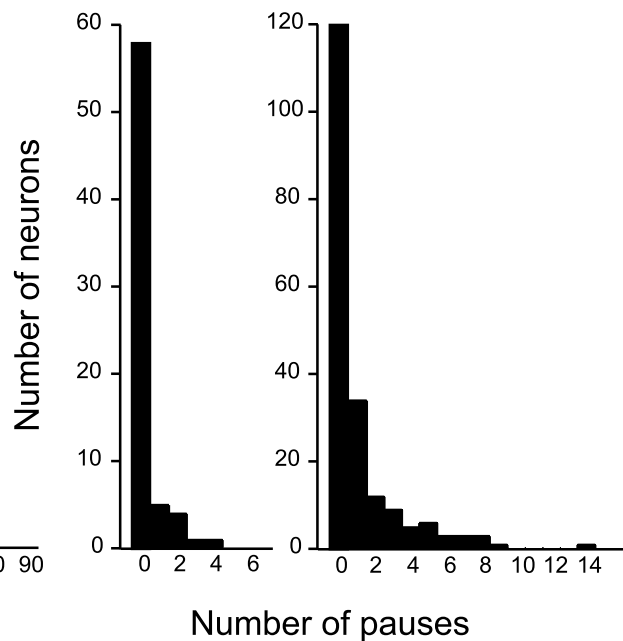

Supplement: Figure_S1.pdf [file Figure_S1.pdf]
